# Supplementary material for: Inter-annual snow accumulation and meter-scale variability from trench measurements at Dome C, Antarctica
Source: Copernicus journal article supplement (doi:10.5194/egusphere-2025-3259), 2025-08-18
Supplement: Supplementary file 1 [file egusphere-2025-3259-supplement.pdf]

SUPPLEMENTARY MATERIAL TO:

**Inter-annual snow accumulation and meter-scale variability from trench measurements at Dome C, Antarctica**

*Adrien Ooms<sup>1</sup>, Mathieu Casado<sup>1</sup>, Ghislain Picard<sup>2</sup>, Laurent Arnaud<sup>2</sup>, Maria Hörhold<sup>3</sup>, Andrea Spolaor<sup>4</sup>, Rita Traversi<sup>4</sup>, Joel Savarino<sup>2</sup>, Patrick Gino<sup>2</sup>, Pete Akers<sup>5</sup>, Birthe Twarloh<sup>3</sup>, and Valérie Masson-Delmotte<sup>1</sup>*

- 5     1 Laboratoire des Sciences du Climat et de l'Environnement, LSCE/IPSL, CEA-CNRS-UVSQ, Université Paris-Saclay, Gif sur Yvette, France
- 2 Institut des Geosciences de l'Environnement (IGE), Université Grenoble Alpes / CNRS, UMR 5001, Grenoble, France
- 3 Department of Geosciences, Alfred-Wegener-Institut Helmholtz-Zentrum für Polar- und Meeresforschung, Bremerhaven, Germany
- 10    4 Institute of Polar Sciences, National Research Council of Italy (ISP-CNR), Venice, Italy
- 5 Discipline of Geography, School of Natural Sciences, Trinity College Dublin, Dublin, Ireland
- Correspondence: Adrien Ooms (adrien.ooms@lsce.ipsl.fr) and Mathieu Casado (mathieu.casado@lsce.ipsl.fr)

Contents of this file

Supplementary text S1 to S6

- 15    Figures S1 to S7

## Appendix S

### S1 Effect of the alignment on correlation patterns

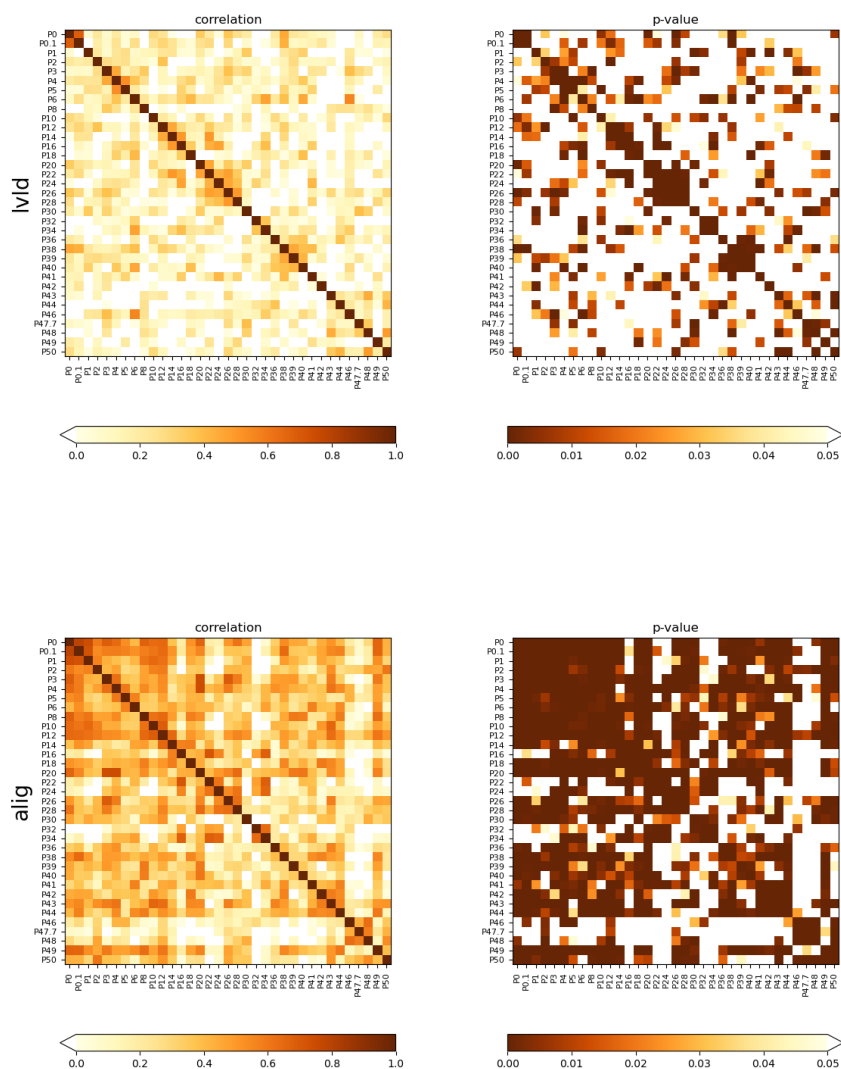

Figure S1: Quantitative diagnosis of the chemistry alignment described in section A3, showing a sharp increase in interprofile correlation across the entire trench after alignment. Only pits distant by 2 m have been used for mean correlation computation presented in the text.

## **S2 More details on the alignment**

### **S2.1 Correcting for missing snow in the upper section of P0**

20 In the results section, we explained how we chose P0 as reference profile for the alignment. P0 has a low value of SSA close to the surface, compared to most profiles in the trench, indicating a hiatus. A preliminary alignment of the highest SSA values across the trench indicates that 70% of profiles have 3 cm more snow (one data-point) than P0. If we used the raw depth scale of P0 with our protocol, we would be discarding this top snow layer, which would hinder the accumulation reconstruction for the top section of the trench. Instead, we proceed to extend the reference profile, adding two datapoint (3 cm at 1.5 cm  
25 resolution) to the chemistry profiles of P0. We create a new reference profile for all species by filling these two data points with the average top 3 cm data of the other profiles with higher SSA values. This way, we obtain a reference profile on which an accurate alignment of the top section of the trench is possible.

## **S3 Sensitivity tests**

### **S3.1 Using P48 as a reference profile**

30 We redo the entire alignment and dating procedure starting from another profile P48 (the other 1.5 cm resolution profile in our dataset). The pair P0-P48 is a great example as it illustrates the differences that can exist between two profiles over the same depth range; they are shown in Figure S2: for example, a large peak around 35-40 cm depth in P0, which is also present in several profiles in the trench, is absent from P48. We recall that P48 sits on top of a dune and the other end of the trench, which could explain the differences in signal archival. This raises the question of how much the aligned trenches resulting from one  
35 or another choice of reference can differ.

To illustrate this, we show the dated profiles P0 and P48 resulting from both alignments (Fig. S2). We get mismatches of up to a year in the position of the peaks. Here we have two factors at play; one is the way both profiles are aligned onto each other, which ought to be symmetric if our alignment is consistent; the second is the way each profile is dated in their respective alignment, which will depend on the matching features between our set of snowpits and the reference profile. When we look  
40 at other profiles, discrepancies can amplify because of different choices in associating peaks to the reference. Comparing both alignments across the trench, the mean absolute difference in dates for each depth is 300 days for the entire trench, versus 150 days for P0 and P48.

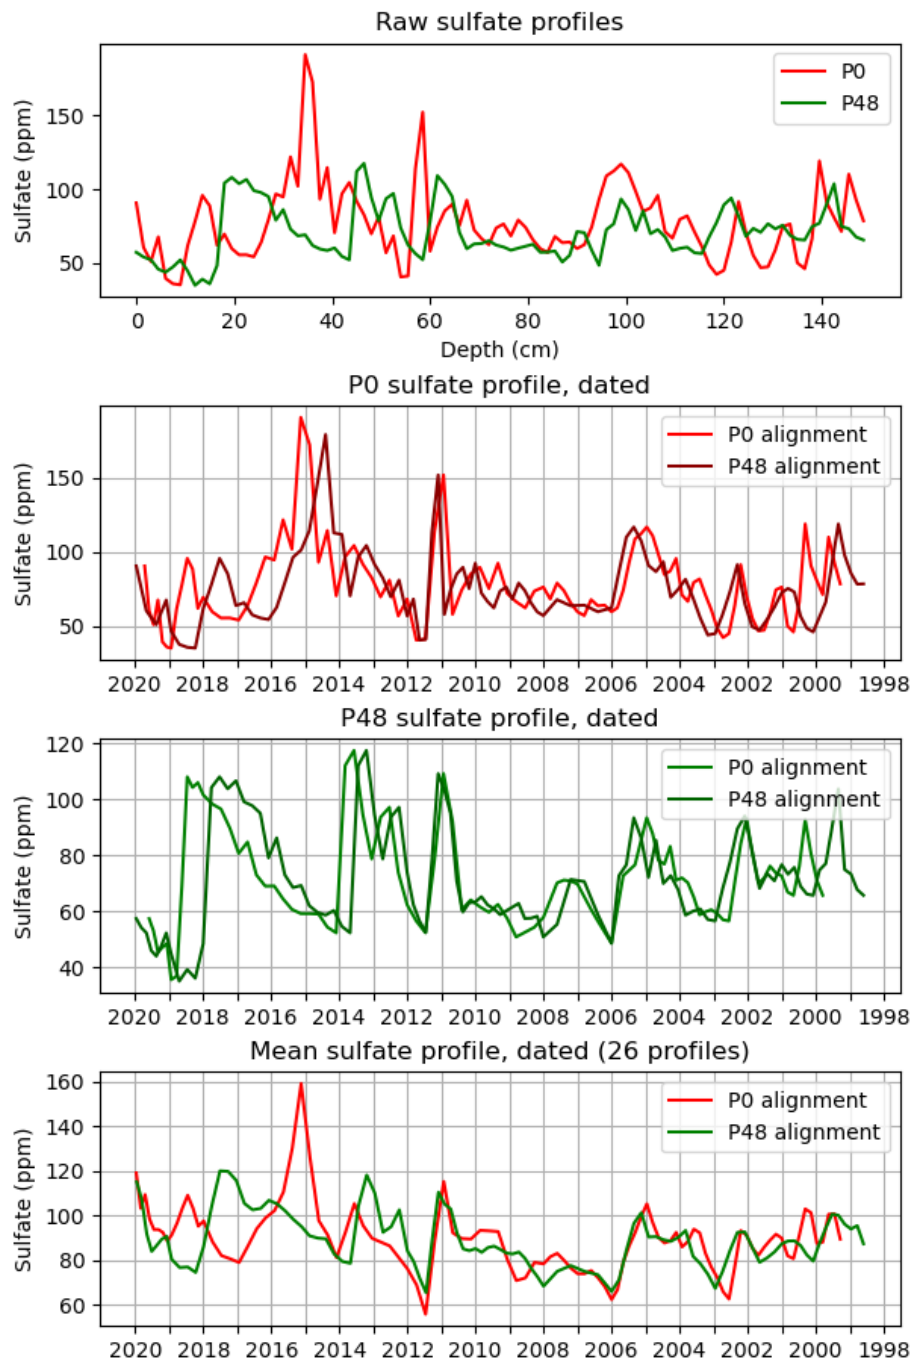

Figure S2: Sulfate profiles for P0 and P48 against depth and against time for alignment and dating procedures based on two different reference profiles.

Despite those differences, the mean accumulation reconstructions are extremely similar, as shown in Figure S3. The mean accumulation over the 20 year period is  $23.9 \pm 1.5 \text{ kgm}^{-2}$  for the P0 alignment and  $23.1 \pm 1.4 \text{ kgm}^{-2}$  for the P48 alignment  
 45 ( $\pm 1 \sigma$  spatial envelopes).

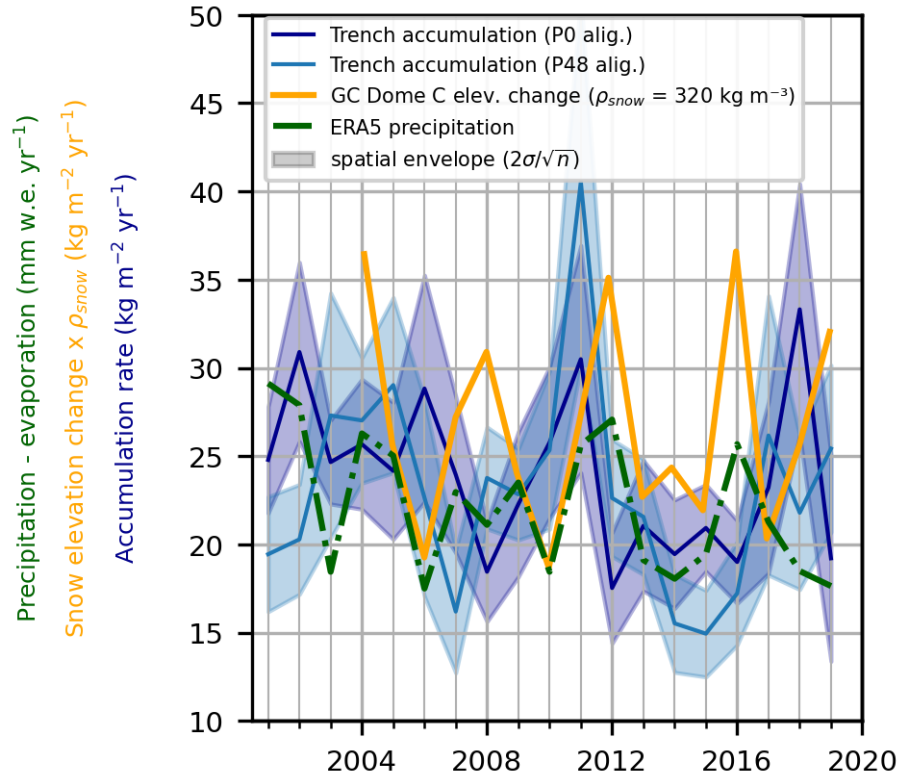

Figure S3: This figure illustrates the uncertainty arising from the choice of the reference profile: P0 as in the main text, or 48. We stress that, despite expected differences, as our method is not resolving annual variations, the two estimates lie within their spatial envelopes (sharded blue and purple curves), and the choice of the reference profile does not explain the differences between the trench and the GLACIOCLIM data.

#### S4 Snow accumulation distribution

The estimation of accumulation hiatus probability as presented in Section 3.4 relates to the more general question of the distribution of snow elevation change at a given time interval. Here we present two additional figures that illustrate how the trench dataset bridges between the 2 years of RLS high resolution snow elevation maps and the 14 years of GLACIOCLIM  
 50 annual snow elevation change measurements. Fig. S4 (a) shows the distribution of snow accumulation rates, and Fig. S4 (b) shows the standard deviation.

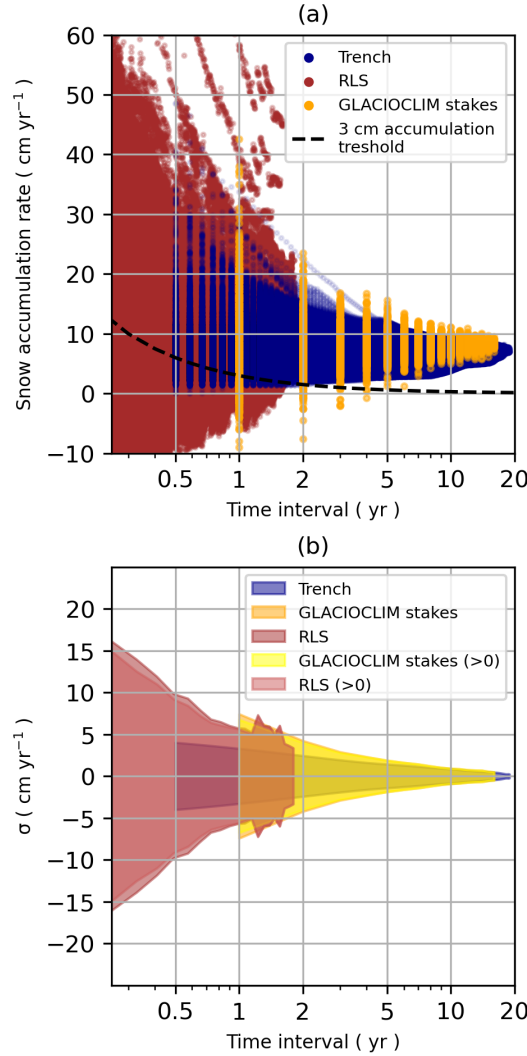

Figure S4: (a) Distribution of snow accumulation rate of single accumulation events according to the trench, RLS and GLACIOCLIM stakes datasets. Accumulation events are obtained from the datasets just as in Section 3.4, using daily elevation maps for RLS, monthly isochrones for the trench and yearly elevation readings for GLACIOCLIM. Time intervals under 6 months are discarded for the trench as they are under our resolution limit. This is an intermediate figure for the computation of hiatus probability: the black dashed line represents 3 cm total accumulation which is the threshold value for non-negligible snow accumulation. The hiatus probability for a given time period, as computed in Section 3.4, is the fraction of accumulation events under this threshold. (b) Standard deviation of accumulation rates over a given time interval for the trench, RLS and GLACIOCLIM stakes datasets. Same as (a) but centered around mean and given in standard deviation. The accumulation converges around the mean (mean/sigma  $< 1\%$ ) for periods longer than 10 years.

## S5 Additional datasets

When comparing our accumulation estimates from the trench to ERA5 reanalysis data, one can ask whether another reanalysis dataset provides a better match, especially in terms of inter-annual variability and dephasing. We tested this with the Modern-Era Retrospective analysis for Research and Applications, version 2 (MERRA2) (Gelaro et al., 2017). We consider the grid-point closest to Dome C ( $75^{\circ} 00' \text{ S}$ ,  $123^{\circ} 125' \text{ E}$ ). The precipitation time series of MERRA2 along with the datasets of the main text is shown in Figure S5. The precipitation time series is very similar to ERA5, showing the same dephasing of annual precipitation peaks when compared to the trench accumulation time series. Note that we did not check the contribution of sublimation.

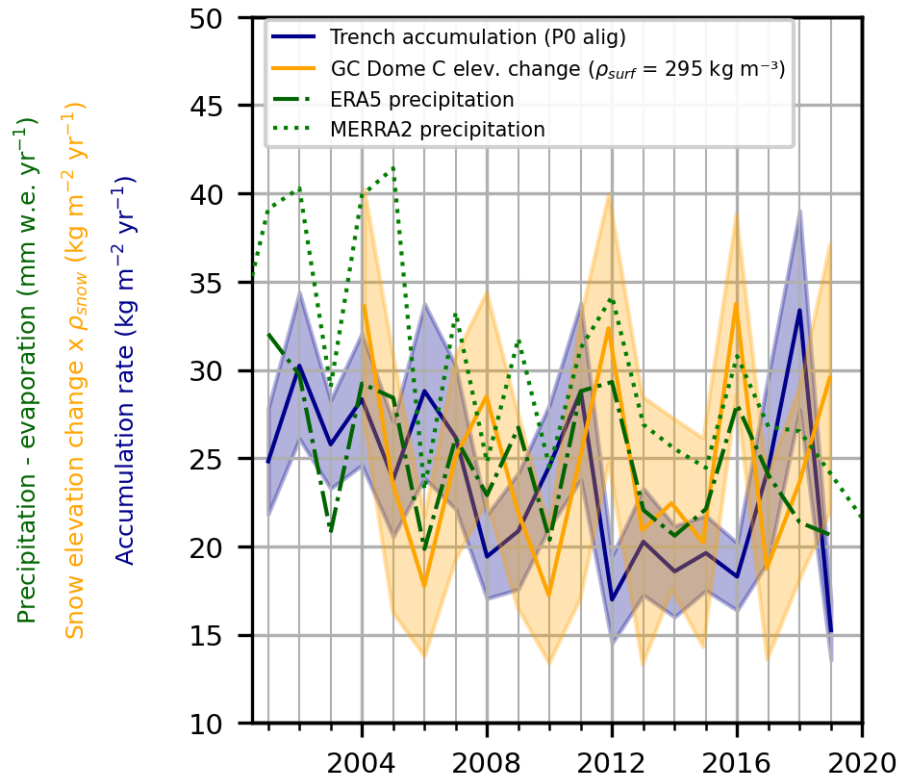

Figure S5: Same as figure 6 using MERRA2 in addition to ERA5 reanalysis precipitation outputs. MERRA2 and ERA5 precipitation datasets show a systematic offset and a quite close correlation that does not change the results. Note that here we show precipitation (as opposed to precipitation - sublimation in main text).

## 60 S6 Effect of the alignment on other chemical species

The isochrones presented in the results section are mainly based on the sulfate peak matching. It is interesting to check whether an increase in inter profile correlation of the signal is also visible on other chemical species in the aligned trench, compared to the raw data.

### S6.1 MSA

65 MSA profiles shows a large inter-annual variability in the first 1 m under the surface, with 3 peaks above  $25 \text{ ng g}^{-1}$ , against a background value of  $10\text{-}15 \text{ ng g}^{-1}$ . Beyond 1 m depth, the signal is noticeably damped, with values around  $10 \text{ ng g}^{-1}$  in the 100-160 cm depth range.

After alignment, which we recall is mainly based on sulfate peak to peak matching, and only secondarily based on MSA, the common signal in MSA is nevertheless well improved. Inter profile correlation goes from 0.23 to 0.34 compared to the  
70 leveled trench, and the number of significant correlations goes from 60% to 70%. The mean signal in the aligned trench, shown on the right in figure S6, is noticeably sharper than in the leveled trench.

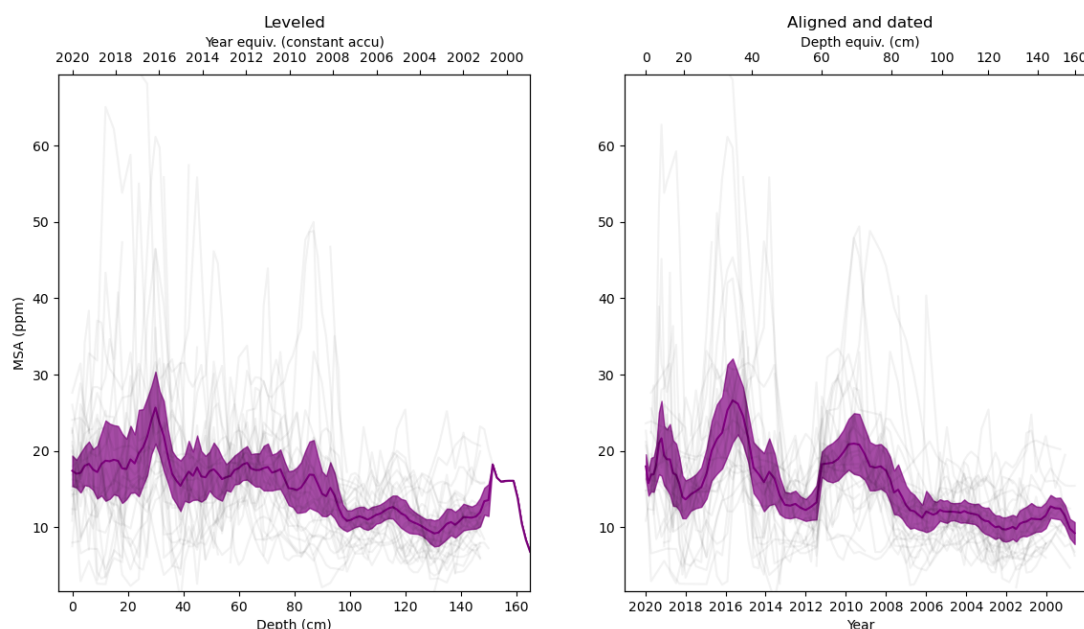

Figure S6: MSA profiles in the leveled and aligned trench, showing a damped signal below 1 m depth. Individual profiles are shown in light grey, and the purple curve represents the mean. The envelope indicates two standard deviation divided by  $\sqrt{n}$ .

## S6.2 SSA

SSA. In our alignment protocole, we have only used SSA to get the topmost tie point for each profile in the upper section of the trench. SSA values exhibit a steady decrease in the first 40 cm just under the surface. Surface SSA can be as high as 70  $\text{m}^2\text{kg}^{-1}$  in the surface layers and drop consistently below 20  $\text{m}^2\text{kg}^{-1}$  at 40 cm depth and beyond.

It has been already documented that SSA values of 60  $\text{m}^2\text{kg}^{-1}$  and above correspond to snow from the winter season (Picard et al., 2016b). In our case, high SSA value can only correspond to snow from the 2019 winter season. It is not expected for SSA slopes to align as a direct result of the sulfate isochrone alignment. Indeed, grain size growth depends on the burial history of the snow. Snow that has been exposed for a longer time will be subject to metamorphism for an extended period, resulting in a sharper gradient of SSA.

In (Fig. S7), SSA data show a sharp decrease across the 2020 to 2018 isochrones. The maximum value of SSA at the 2019 level is 37  $\text{kg m}^2$ , and the 90% quantile is 35  $\text{kg m}^2$ . So values of SSA under 37  $\text{m}^2 \text{kg}^{-1}$  at the time of the trench sampling on the East Antarctic plateau can be attributed to snow older than a year. Based on the distribution of SSA in surface snow (2019 level), with a mean value of 37  $\text{kg m}^{-2}$  (and a 90% quantile of 35  $\text{kg m}^{-2}$ ), we interpret the fraction of profiles with SSA under the threshold value of 37  $\text{kgm}^{-2}$  (indicator of snow older than a year) as the annual hiatus probability at the surface at the time of sampling. We identify about 20% of the profiles (6 out of 26) with surface SSA under this threshold. When using the 90% quantile threshold (35  $\text{kg m}^{-2}$ ), the annual hiatus estimate for year 2019 is reduced to about 10% (3 out of 26 profiles), giving a 10-20% estimate of annual hiatus for the year 2019.

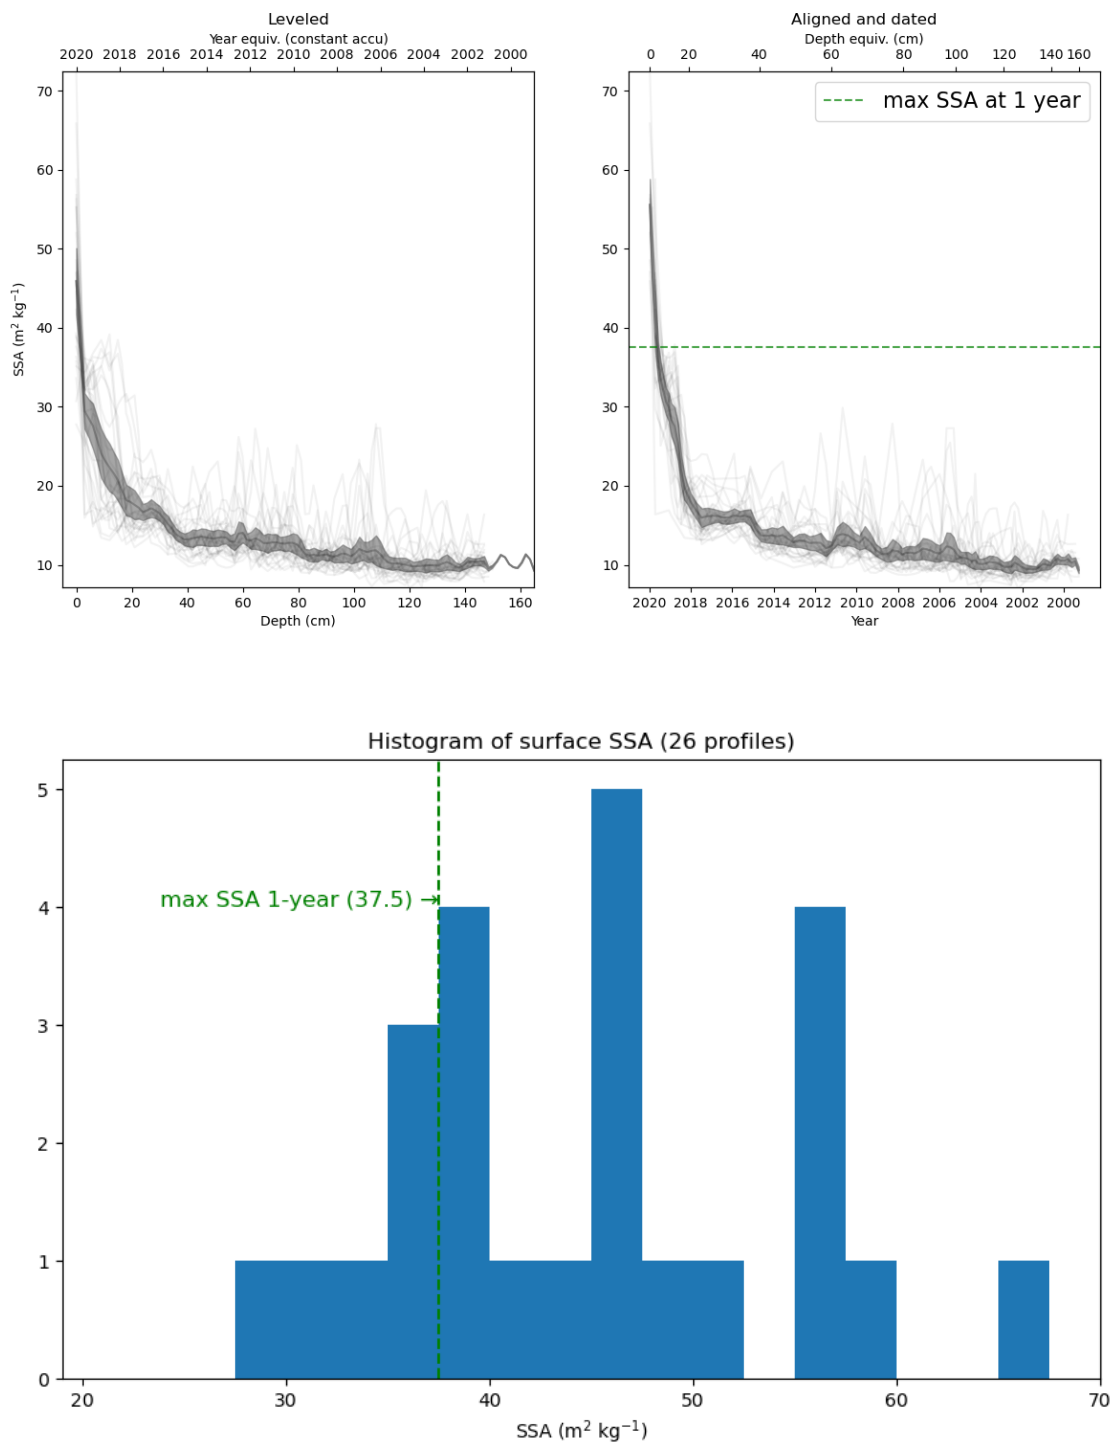

Figure S7: Decreasing behaviour with depth. 1 year SSA corresponds to the 35 unit threshold.
